# Supplementary material
Source: publisher figshare collection journal article supplement (https://acs.figshare.com/ndownloader/files/5182648)
Supplement: Supplementary file 1 [file 5182648]

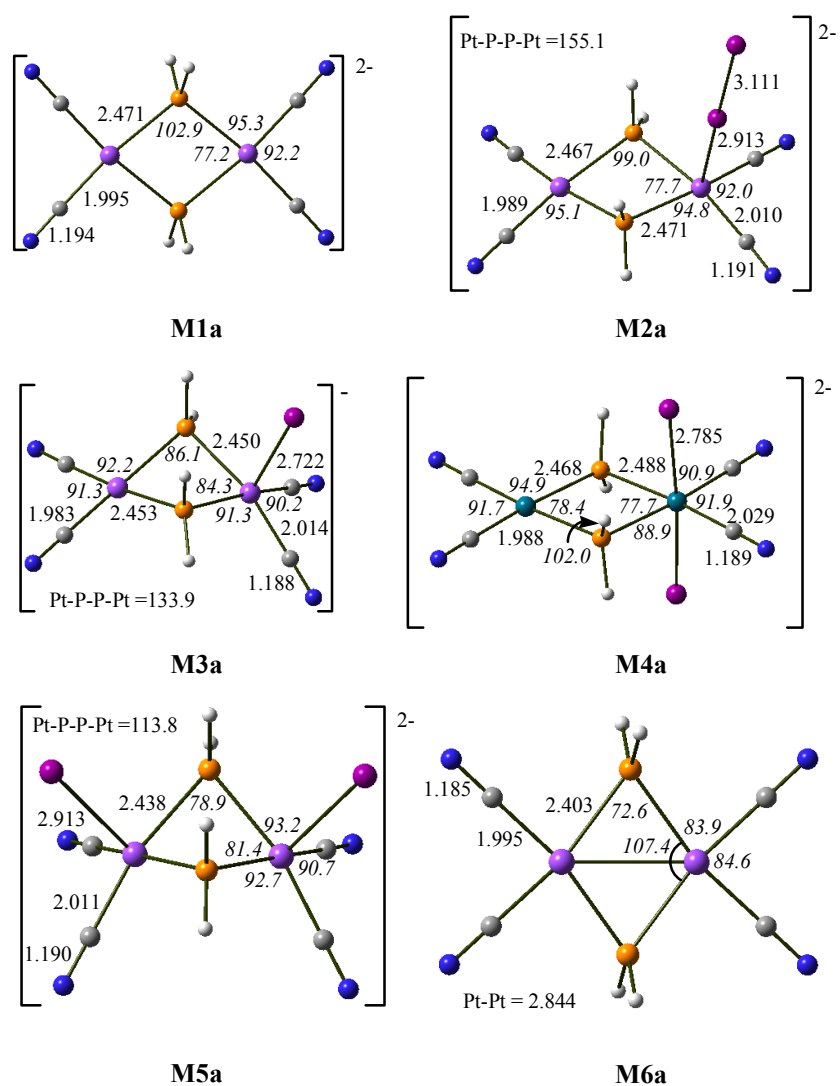

**Figure S1.** Equilibrium geometries (bond lengths in Å, bond angles in degrees) of all species involved in the oxidation of  $[(\text{CN})_2\text{Pt}(\mu\text{-PH}_2)_2\text{Pt}(\text{CN})_2]^{2-}$  complex to the neutral binuclear Pt(III) complex  $[(\text{CN})_2\text{Pt}(\mu\text{-PH}_2)_2\text{Pt}(\text{CN})_2]$  using  $\text{I}_2$  as oxidant.
